# Supplementary material for: Differences in histomorphology and expression of key lipid regulated genes of four adipose tissues from Tibetan pigs
Source: PeerJ. 2023 Jan 9;11:e14556. doi: 10.7717/peerj.14556 (PMC9835692; doi:10.7717/peerj.14556)
Supplement: Supplemental Information 1 [file peerj-11-14556-s001.xlsx]

## Sheet: Table S1
Table S1 Feed ingredients and nutrients composition of the experimental diet
Item
Ingredients,%
Corn	62
Soybean meal	25.8
Rice bran meal	8.2
Mulberry leaf powder	-
Wheat midding	1
Soybean oil	1
Vitamin-mineral premix(The premix provided the following amounts per kilogram of diet: Fe, 375mg as iron sulfate; Cu)	2
Digestible energy, Mcal/kg	3.32
Crude protein	17.61
Crude fiber	3.16
Calcium	0.61
Total phosphorus	0.7
Lysine	0.76
Methionine + cysteine, %	0.47
Threonine,%	0.54
Tryptophan, %	0.17

## Sheet: Table S2
Table S2 Raw data for adipocyte area
Sample Name	area	adipocyte number
subcutaneous fat-1	8242.69	142
subcutaneous fat-2	8189.81	143
subcutaneous fat-3	2431.69	483
subcutaneous fat-4	3215.38	365
subcutaneous fat-5	5621.09	209
subcutaneous fat-6	9195.61	127
subcutaneous fat-7	4451.18	264
perirenal fat-1	9538.97	123
perirenal fat-2	7961.18	147
perirenal fat-3	9571.13	122
perirenal fat-4	8527.78	137
perirenal fat-5	8275.31	142
perirenal fat-6	7575.83	155
perirenal fat-7	6693.23	175
greater omentum fat-1	10496.1	85
greater omentum fat-2	9221.79	62
greater omentum fat-3	8506.4	69
greater omentum fat-4	11750.8	85
greater omentum fat-5	7588.01	53
greater omentum fat-6	11016.7	71
greater omentum fat-7	16081.2	91
inguinal fat-1	10077.1	118
inguinal fat-2	11238.5	179
inguinal fat-3	13188.6	190
inguinal fat-4	12047.1	141
inguinal fat-5	8802.84	164
inguinal fat-6	8156.69	114
inguinal fat-7	17790.9	194

## Sheet: Table S3
Table S3 The sequence of primers
gene name	Forward sequence	Reverse sequence	Tm
PPAR-γ	GCCCTTCACCACTGTTGATT	GAGTTGGAAGGCTCTTCGTG	58
FABP3	GCACAGGTAATAGCAGTGAGTGC	CACACAATGGACAAGAATGCTG	58
FABP4	AAGGCAACGTCCGCTATTTG	ATGGGGCCCTTGTGGGAGA	59
FABP5	GCCATGGCCTCCATCCA	GTCAAAGCCTTTGCTCTCCACTA	58
FASN	GTTTCACCTCCATCCGCATC	TAGGCTTGAGATGCTCCTGG	58
ME1	GCAGTCCTTTTGATCCGGTC	CGGCCTTCTTCCAAGTGTTT	58
ACACA	ATGGCTCGTGTGTGGAAGTA	GTGAGCGCATTACTGAAGGG	59
C/EBPβ	CGGACTGCAAGCGGAAGGAGGA	GGCTGGACGACGAGGATGTGGA	60
ELOVL6	CCTTTATCTTTGGCGGTCGG	CTAGTTCCGGTGCTTTGCTC	58
LPL	CTCGTGCTCAGATGCCCTAC	GGCAGGGTGAAAGGGATGTT	60
SCD	TTTTCCCCAAAGCCTGTTCG	AGGGAAAGGTGTGGTGGTAG	58
DGAT2	GTTCCCACCTACTCCTTCGG	TGGTGATGGGCTTGGAGTAG	59
B2M	GCGGAAAACGGAAAGCCAAA	GCGGCAGCTATACTGATCCA	60

## Sheet: Table S4
Table S4 Raw data for RT-qPCR
Sample Name	Target Name	CT
subcutaneous fat-1	B2M	19.9575
subcutaneous fat-1	B2M	20.1797
subcutaneous fat-1	B2M	19.9551
perirenal fat-1	B2M	19.5503
perirenal fat-1	B2M	19.1703
perirenal fat-1	B2M	19.2499
greater omentum fat-1	B2M	20.0667
greater omentum fat-1	B2M	19.6579
greater omentum fat-1	B2M	20.0808
inguinal fat-1	B2M	19.1221
inguinal fat-1	B2M	18.8519
inguinal fat-1	B2M	19.055
subcutaneous fat-2	B2M	19.6875
subcutaneous fat-2	B2M	19.7603
subcutaneous fat-2	B2M	19.604
perirenal fat-2	B2M	19.4782
perirenal fat-2	B2M	19.353
perirenal fat-2	B2M	19.49
greater omentum fat-2	B2M	20.2457
greater omentum fat-2	B2M	20.4026
greater omentum fat-2	B2M	20.4618
inguinal fat-2	B2M	19.1732
inguinal fat-2	B2M	19.0823
inguinal fat-2	B2M	19.2729
subcutaneous fat-3	B2M	19.4619
subcutaneous fat-3	B2M	19.2776
subcutaneous fat-3	B2M	19.1998
perirenal fat-3	B2M	19.479
perirenal fat-3	B2M	19.4601
perirenal fat-3	B2M	19.5728
greater omentum fat-3	B2M	18.1363
greater omentum fat-3	B2M	18.6478
greater omentum fat-3	B2M	18.0013
inguinal fat-3	B2M	17.7589
inguinal fat-3	B2M	17.8013
inguinal fat-3	B2M	17.7607
subcutaneous fat-4	B2M	22.3654
subcutaneous fat-4	B2M	18.7043
perirenal fat-4	B2M	22.6221
perirenal fat-4	B2M	22.3166
greater omentum fat-4	B2M	22.0933
greater omentum fat-4	B2M	22.0314
inguinal fat-4	B2M	20.6312
inguinal fat-4	B2M	19.9703
subcutaneous fat-5	B2M	18.011
subcutaneous fat-5	B2M	18.7359
perirenal fat-5	B2M	18.1913
perirenal fat-5	B2M	19.5342
greater omentum fat-5	B2M	19.8717
greater omentum fat-5	B2M	18.3427
inguinal fat-5	B2M	17.801
inguinal fat-5	B2M	18.872
subcutaneous fat-1	DGAT2	21.5747
subcutaneous fat-1	DGAT2	21.7661
subcutaneous fat-1	DGAT2	21.6609
perirenal fat-1	DGAT2	24.9544
perirenal fat-1	DGAT2	25.004
perirenal fat-1	DGAT2	25.0614
greater omentum fat-1	DGAT2	21.7061
greater omentum fat-1	DGAT2	21.7183
greater omentum fat-1	DGAT2	21.7236
inguinal fat-1	DGAT2	20.6923
inguinal fat-1	DGAT2	20.734
inguinal fat-1	DGAT2	20.8057
subcutaneous fat-2	DGAT2	21.5806
subcutaneous fat-2	DGAT2	21.6674
subcutaneous fat-2	DGAT2	21.7049
perirenal fat-2	DGAT2	22.3568
perirenal fat-2	DGAT2	22.3357
perirenal fat-2	DGAT2	22.442
greater omentum fat-2	DGAT2	22.5607
greater omentum fat-2	DGAT2	22.4914
greater omentum fat-2	DGAT2	22.4961
inguinal fat-2	DGAT2	22.0434
inguinal fat-2	DGAT2	22.0503
inguinal fat-2	DGAT2	22.1161
subcutaneous fat-3	DGAT2	22.5707
subcutaneous fat-3	DGAT2	22.6715
subcutaneous fat-3	DGAT2	22.7241
perirenal fat-3	DGAT2	25.6113
perirenal fat-3	DGAT2	25.7566
perirenal fat-3	DGAT2	25.6723
greater omentum fat-3	DGAT2	23.5089
greater omentum fat-3	DGAT2	23.5482
greater omentum fat-3	DGAT2	23.5806
inguinal fat-3	DGAT2	21.5742
inguinal fat-3	DGAT2	21.704
inguinal fat-3	DGAT2	21.6223
subcutaneous fat-4	DGAT2	26.5683
subcutaneous fat-4	DGAT2	23.9662
perirenal fat-4	DGAT2	26.912
perirenal fat-4	DGAT2	26.314
greater omentum fat-4	DGAT2	20.3853
greater omentum fat-4	DGAT2	21.5275
inguinal fat-4	DGAT2	20.0503
inguinal fat-4	DGAT2	23.8643
subcutaneous fat-5	DGAT2	25.5267
subcutaneous fat-5	DGAT2	23.5066
perirenal fat-5	DGAT2	27.8826
perirenal fat-5	DGAT2	25.914
greater omentum fat-5	DGAT2	20.0471
greater omentum fat-5	DGAT2	20.6517
inguinal fat-5	DGAT2	22.9128
inguinal fat-5	DGAT2	23.596
subcutaneous fat-1	FABP4	19.901
subcutaneous fat-1	FABP4	19.8537
subcutaneous fat-1	FABP4	20.041
perirenal fat-1	FABP4	22.6878
perirenal fat-1	FABP4	22.7424
perirenal fat-1	FABP4	22.6757
greater omentum fat-1	FABP4	21.1615
greater omentum fat-1	FABP4	21.1985
greater omentum fat-1	FABP4	21.1274
inguinal fat-1	FABP4	19.0361
inguinal fat-1	FABP4	19.0356
inguinal fat-1	FABP4	18.9852
subcutaneous fat-2	FABP4	19.7373
subcutaneous fat-2	FABP4	20.0607
subcutaneous fat-2	FABP4	19.8776
perirenal fat-2	FABP4	19.1322
perirenal fat-2	FABP4	19.2738
perirenal fat-2	FABP4	19.247
greater omentum fat-2	FABP4	20.4877
greater omentum fat-2	FABP4	20.5837
greater omentum fat-2	FABP4	20.4551
inguinal fat-2	FABP4	18.7866
inguinal fat-2	FABP4	18.9913
inguinal fat-2	FABP4	18.8963
subcutaneous fat-3	FABP4	19.1928
subcutaneous fat-3	FABP4	19.321
subcutaneous fat-3	FABP4	19.4333
perirenal fat-3	FABP4	21.8271
perirenal fat-3	FABP4	21.9332
perirenal fat-3	FABP4	21.8774
greater omentum fat-3	FABP4	19.3215
greater omentum fat-3	FABP4	19.4265
greater omentum fat-3	FABP4	19.422
inguinal fat-3	FABP4	17.5264
inguinal fat-3	FABP4	17.7452
inguinal fat-3	FABP4	17.7867
subcutaneous fat-4	FABP4	20.8022
subcutaneous fat-4	FABP4	20.4805
perirenal fat-4	FABP4	18.5731
perirenal fat-4	FABP4	22.087
greater omentum fat-4	FABP4	18.7266
greater omentum fat-4	FABP4	19.7268
inguinal fat-4	FABP4	20.3231
inguinal fat-4	FABP4	19.2533
subcutaneous fat-5	FABP4	20.6235
subcutaneous fat-5	FABP4	21.2993
perirenal fat-5	FABP4	21.354
perirenal fat-5	FABP4	18.0237
greater omentum fat-5	FABP4	23.0913
greater omentum fat-5	FABP4	23.2479
inguinal fat-5	FABP4	21.1657
inguinal fat-5	FABP4	19.5213
subcutaneous fat-1	FASN	20.7692
subcutaneous fat-1	FASN	21.1428
subcutaneous fat-1	FASN	20.9734
perirenal fat-1	FASN	27.6269
perirenal fat-1	FASN	27.5178
perirenal fat-1	FASN	28.378
greater omentum fat-1	FASN	20.5117
greater omentum fat-1	FASN	20.5872
greater omentum fat-1	FASN	20.3594
inguinal fat-1	FASN	20.2867
inguinal fat-1	FASN	20.2092
inguinal fat-1	FASN	20.2504
subcutaneous fat-2	FASN	19.9679
subcutaneous fat-2	FASN	19.7304
subcutaneous fat-2	FASN	20.0792
perirenal fat-2	FASN	22.5582
perirenal fat-2	FASN	22.5205
perirenal fat-2	FASN	22.7096
greater omentum fat-2	FASN	22.07
greater omentum fat-2	FASN	22.0505
greater omentum fat-2	FASN	21.8462
inguinal fat-2	FASN	21.6577
inguinal fat-2	FASN	21.4567
inguinal fat-2	FASN
subcutaneous fat-3	FASN	19.8684
subcutaneous fat-3	FASN	20.5634
subcutaneous fat-3	FASN	20.6719
perirenal fat-3	FASN	25.4502
perirenal fat-3	FASN	25.3091
perirenal fat-3	FASN	27.3684
greater omentum fat-3	FASN	23.5267
greater omentum fat-3	FASN	24.0966
greater omentum fat-3	FASN	23.8055
inguinal fat-3	FASN	19.5972
inguinal fat-3	FASN	19.8621
inguinal fat-3	FASN	19.8443
subcutaneous fat-4	FASN	17.4257
subcutaneous fat-4	FASN	18.4892
perirenal fat-4	FASN	22.5751
perirenal fat-4	FASN	22.2134
greater omentum fat-4	FASN	17.9829
greater omentum fat-4	FASN	18.3553
inguinal fat-4	FASN	17.8661
inguinal fat-4	FASN	18.2781
subcutaneous fat-5	FASN	18.8634
subcutaneous fat-5	FASN	18.5945
perirenal fat-5	FASN	21.1161
perirenal fat-5	FASN	22.9263
greater omentum fat-5	FASN	19.1607
greater omentum fat-5	FASN	17.8789
inguinal fat-5	FASN	20.161
inguinal fat-5	FASN	20.8856
subcutaneous fat-1	ME1	22.6392
subcutaneous fat-1	ME1	22.6592
subcutaneous fat-1	ME1	22.7692
perirenal fat-1	ME1	24.9053
perirenal fat-1	ME1	24.9843
perirenal fat-1	ME1	24.9692
greater omentum fat-1	ME1	22.5237
greater omentum fat-1	ME1	22.5631
greater omentum fat-1	ME1	22.4302
inguinal fat-1	ME1	21.7163
inguinal fat-1	ME1	21.9314
inguinal fat-1	ME1	21.9551
subcutaneous fat-2	ME1	21.1609
subcutaneous fat-2	ME1	21.1438
subcutaneous fat-2	ME1	21.2387
perirenal fat-2	ME1	23.6866
perirenal fat-2	ME1	23.6488
perirenal fat-2	ME1	23.6571
greater omentum fat-2	ME1	22.7382
greater omentum fat-2	ME1	22.9802
greater omentum fat-2	ME1	22.844
inguinal fat-2	ME1	21.6907
inguinal fat-2	ME1	22.5906
inguinal fat-2	ME1	22.7723
subcutaneous fat-3	ME1	23.0485
subcutaneous fat-3	ME1	23.1085
subcutaneous fat-3	ME1	23.2944
perirenal fat-3	ME1	28.3436
perirenal fat-3	ME1	28.3425
perirenal fat-3	ME1	28.6019
greater omentum fat-3	ME1	23.8935
greater omentum fat-3	ME1	23.7394
greater omentum fat-3	ME1	23.9405
inguinal fat-3	ME1	22.2617
inguinal fat-3	ME1	22.1944
inguinal fat-3	ME1	22.5148
subcutaneous fat-4	ME1	28.4801
subcutaneous fat-4	ME1	28.8055
perirenal fat-4	ME1	28.8196
perirenal fat-4	ME1	28.709
greater omentum fat-4	ME1	24.1482
greater omentum fat-4	ME1	24.4252
inguinal fat-4	ME1	24.6834
inguinal fat-4	ME1	24.2028
subcutaneous fat-5	ME1	25.974
subcutaneous fat-5	ME1	26.0312
perirenal fat-5	ME1	26.2173
perirenal fat-5	ME1	26.1794
greater omentum fat-5	ME1	25.9731
greater omentum fat-5	ME1	26.3006
inguinal fat-5	ME1	26.0846
inguinal fat-5	ME1	26.5084
subcutaneous fat-1	SCD	22.9264
subcutaneous fat-1	SCD	22.9098
subcutaneous fat-1	SCD	23.0858
perirenal fat-1	SCD	27.1644
perirenal fat-1	SCD	27.0986
perirenal fat-1	SCD	27.3801
greater omentum fat-1	SCD	24.6592
greater omentum fat-1	SCD	24.6305
greater omentum fat-1	SCD	24.7519
inguinal fat-1	SCD	20.4027
inguinal fat-1	SCD	20.4317
inguinal fat-1	SCD	20.4609
subcutaneous fat-2	SCD	22.4467
subcutaneous fat-2	SCD	22.3954
subcutaneous fat-2	SCD	22.3581
perirenal fat-2	SCD	22.0268
perirenal fat-2	SCD	22.0414
perirenal fat-2	SCD	22.0227
greater omentum fat-2	SCD	22.6758
greater omentum fat-2	SCD	22.792
greater omentum fat-2	SCD	22.9662
inguinal fat-2	SCD	20.0377
inguinal fat-2	SCD	20.33
inguinal fat-2	SCD	20.1123
subcutaneous fat-3	SCD	21.2601
subcutaneous fat-3	SCD	21.2639
subcutaneous fat-3	SCD	21.22
perirenal fat-3	SCD	24.9311
perirenal fat-3	SCD	24.9711
perirenal fat-3	SCD	24.98
greater omentum fat-3	SCD	23.4278
greater omentum fat-3	SCD	23.3913
greater omentum fat-3	SCD	23.3813
inguinal fat-3	SCD	23.2171
inguinal fat-3	SCD	23.3105
inguinal fat-3	SCD	23.7823
subcutaneous fat-4	SCD	26.5872
subcutaneous fat-4	SCD	26.9143
perirenal fat-4	SCD	23.3769
perirenal fat-4	SCD	23.391
greater omentum fat-4	SCD	24.8316
greater omentum fat-4	SCD	24.7938
inguinal fat-4	SCD	24.1826
inguinal fat-4	SCD	23.9476
subcutaneous fat-5	SCD	26.5849
subcutaneous fat-5	SCD	26.6824
perirenal fat-5	SCD	23.3054
perirenal fat-5	SCD	23.163
greater omentum fat-5	SCD	24.9578
greater omentum fat-5	SCD	24.8866
inguinal fat-5	SCD	24.0603
inguinal fat-5	SCD	24.0407
subcutaneous fat-1	FABP3	24.4958
subcutaneous fat-1	FABP3	24.4516
subcutaneous fat-1	FABP3	24.2631
perirenal fat-1	FABP3	27.538
perirenal fat-1	FABP3	27.2706
perirenal fat-1	FABP3	27.3439
greater omentum fat-1	FABP3	25.8814
greater omentum fat-1	FABP3	25.7203
greater omentum fat-1	FABP3	25.7297
inguinal fat-1	FABP3	22.8455
inguinal fat-1	FABP3	22.7475
inguinal fat-1	FABP3	22.7498
subcutaneous fat-2	FABP3	24.2047
subcutaneous fat-2	FABP3	24.1354
subcutaneous fat-2	FABP3	24.1294
perirenal fat-2	FABP3	25.0175
perirenal fat-2	FABP3	25.0392
perirenal fat-2	FABP3	25.0785
greater omentum fat-2	FABP3	24.7484
greater omentum fat-2	FABP3	24.7025
greater omentum fat-2	FABP3	24.6792
inguinal fat-2	FABP3	24.8067
inguinal fat-2	FABP3	24.7134
inguinal fat-2	FABP3	25.4183
subcutaneous fat-3	FABP3	22.5839
subcutaneous fat-3	FABP3	22.2733
subcutaneous fat-3	FABP3	22.5692
perirenal fat-3	FABP3	28.2003
perirenal fat-3	FABP3	27.8361
perirenal fat-3	FABP3	28.047
greater omentum fat-3	FABP3	30.2721
greater omentum fat-3	FABP3	30.075
greater omentum fat-3	FABP3	29.976
inguinal fat-3	FABP3	24.4647
inguinal fat-3	FABP3	24.5898
inguinal fat-3	FABP3	24.5723
subcutaneous fat-4	FABP3	22.0004
subcutaneous fat-4	FABP3	22.3233
perirenal fat-4	FABP3	34.0135
perirenal fat-4	FABP3	28.9425
greater omentum fat-4	FABP3	21.656
greater omentum fat-4	FABP3	21.8027
inguinal fat-4	FABP3	20.5933
inguinal fat-4	FABP3	19.4258
subcutaneous fat-5	FABP3	22.5247
subcutaneous fat-5	FABP3	22.7651
perirenal fat-5	FABP3	31.0096
perirenal fat-5	FABP3	29.3494
greater omentum fat-5	FABP3	22.0723
greater omentum fat-5	FABP3	22.4858
inguinal fat-5	FABP3	20.4069
inguinal fat-5	FABP3	19.7459
subcutaneous fat-1	FABP5	24.2573
subcutaneous fat-1	FABP5	24.3291
subcutaneous fat-1	FABP5	24.3003
perirenal fat-1	FABP5	25.9284
perirenal fat-1	FABP5	25.8264
perirenal fat-1	FABP5	25.9759
greater omentum fat-1	FABP5	26.49
greater omentum fat-1	FABP5	26.3764
greater omentum fat-1	FABP5	26.6426
inguinal fat-1	FABP5	23.0779
inguinal fat-1	FABP5	22.7175
inguinal fat-1	FABP5	22.9703
subcutaneous fat-2	FABP5	24.4957
subcutaneous fat-2	FABP5	24.4327
subcutaneous fat-2	FABP5	24.5883
perirenal fat-2	FABP5	24.4606
perirenal fat-2	FABP5	24.3824
perirenal fat-2	FABP5	24.4204
greater omentum fat-2	FABP5	23.405
greater omentum fat-2	FABP5	23.337
greater omentum fat-2	FABP5	23.5297
inguinal fat-2	FABP5	23.3892
inguinal fat-2	FABP5	23.5444
inguinal fat-2	FABP5	23.4499
subcutaneous fat-3	FABP5	22.5402
subcutaneous fat-3	FABP5	22.2495
subcutaneous fat-3	FABP5	22.3845
perirenal fat-3	FABP5	24.258
perirenal fat-3	FABP5	24.3204
perirenal fat-3	FABP5	24.4613
greater omentum fat-3	FABP5	27.4533
greater omentum fat-3	FABP5	27.3959
greater omentum fat-3	FABP5	27.4112
inguinal fat-3	FABP5	23.2401
inguinal fat-3	FABP5	23.1761
inguinal fat-3	FABP5	23.4281
subcutaneous fat-4	FABP5	25.2281
subcutaneous fat-4	FABP5	25.6711
perirenal fat-4	FABP5	23.0109
perirenal fat-4	FABP5	23.2358
greater omentum fat-4	FABP5	24.7782
greater omentum fat-4	FABP5	25.1219
inguinal fat-4	FABP5	24.0645
inguinal fat-4	FABP5	23.8302
subcutaneous fat-5	FABP5	25.2128
subcutaneous fat-5	FABP5	26.1169
perirenal fat-5	FABP5	23.8008
perirenal fat-5	FABP5	23.5673
greater omentum fat-5	FABP5	25.3635
greater omentum fat-5	FABP5	25.4226
inguinal fat-5	FABP5	24.6319
inguinal fat-5	FABP5	24.7728
subcutaneous fat-1	CEBPB	26.6419
subcutaneous fat-1	CEBPB	26.579
subcutaneous fat-1	CEBPB	26.6093
perirenal fat-1	CEBPB	29.1262
perirenal fat-1	CEBPB	29.3062
perirenal fat-1	CEBPB	29.107
greater omentum fat-1	CEBPB	26.7365
greater omentum fat-1	CEBPB	26.8734
greater omentum fat-1	CEBPB	26.8605
inguinal fat-1	CEBPB	25.783
inguinal fat-1	CEBPB	25.8699
inguinal fat-1	CEBPB	25.8092
subcutaneous fat-2	CEBPB	26.0906
subcutaneous fat-2	CEBPB	26.249
subcutaneous fat-2	CEBPB	26.2347
perirenal fat-2	CEBPB	25.3953
perirenal fat-2	CEBPB	25.3067
perirenal fat-2	CEBPB	25.299
greater omentum fat-2	CEBPB	26.8917
greater omentum fat-2	CEBPB	27.0062
greater omentum fat-2	CEBPB	26.9604
inguinal fat-2	CEBPB	24.9327
inguinal fat-2	CEBPB	24.6552
inguinal fat-2	CEBPB	24.7689
subcutaneous fat-3	CEBPB	25.0008
subcutaneous fat-3	CEBPB	24.9874
subcutaneous fat-3	CEBPB	25.1311
perirenal fat-3	CEBPB	28.6544
perirenal fat-3	CEBPB	28.5244
perirenal fat-3	CEBPB	28.3888
greater omentum fat-3	CEBPB	26.9776
greater omentum fat-3	CEBPB	26.9469
greater omentum fat-3	CEBPB	26.7763
inguinal fat-3	CEBPB	24.3536
inguinal fat-3	CEBPB	24.1147
inguinal fat-3	CEBPB	24.3614
subcutaneous fat-4	CEBPB	26.294
subcutaneous fat-4	CEBPB	26.6118
perirenal fat-4	CEBPB	23.8332
perirenal fat-4	CEBPB	24.6709
greater omentum fat-4	CEBPB	26.2309
greater omentum fat-4	CEBPB	26.2373
inguinal fat-4	CEBPB	24.3584
inguinal fat-4	CEBPB	24.8994
subcutaneous fat-5	CEBPB	27.4145
subcutaneous fat-5	CEBPB	27.8258
perirenal fat-5	CEBPB	25.2693
perirenal fat-5	CEBPB	25.7751
greater omentum fat-5	CEBPB	27.0643
greater omentum fat-5	CEBPB	27.5189
inguinal fat-5	CEBPB	26.6859
inguinal fat-5	CEBPB	26.0885
subcutaneous fat-1	LPL	22.9529
subcutaneous fat-1	LPL	23.0036
subcutaneous fat-1	LPL	23.1885
perirenal fat-1	LPL	28.8918
perirenal fat-1	LPL	29.0366
perirenal fat-1	LPL	29.1041
greater omentum fat-1	LPL	27.7005
greater omentum fat-1	LPL	27.4857
greater omentum fat-1	LPL	27.6429
inguinal fat-1	LPL	22.1832
inguinal fat-1	LPL	22.331
inguinal fat-1	LPL	22.4254
subcutaneous fat-2	LPL	23.6187
subcutaneous fat-2	LPL	23.61
subcutaneous fat-2	LPL	23.8042
perirenal fat-2	LPL	24.4684
perirenal fat-2	LPL	22.1462
perirenal fat-2	LPL	22.1083
greater omentum fat-2	LPL	21.7589
greater omentum fat-2	LPL	21.9185
greater omentum fat-2	LPL	22.149
inguinal fat-2	LPL	20.5403
inguinal fat-2	LPL	20.1827
inguinal fat-2	LPL	20.3445
subcutaneous fat-3	LPL	21.6619
subcutaneous fat-3	LPL	21.6313
subcutaneous fat-3	LPL	21.6459
perirenal fat-3	LPL	26.7995
perirenal fat-3	LPL	26.6762
perirenal fat-3	LPL	26.7585
greater omentum fat-3	LPL	21.2619
greater omentum fat-3	LPL	21.3732
greater omentum fat-3	LPL	21.4438
inguinal fat-3	LPL	27.1259
inguinal fat-3	LPL	27.1123
inguinal fat-3	LPL	27.1097
subcutaneous fat-4	LPL	25.2564
subcutaneous fat-4	LPL	26.6642
perirenal fat-4	LPL	26.1542
perirenal fat-4	LPL	26.0498
greater omentum fat-4	LPL	25.0422
greater omentum fat-4	LPL	25.7193
inguinal fat-4	LPL	26.5301
inguinal fat-4	LPL	26.4245
subcutaneous fat-5	LPL	25.4628
subcutaneous fat-5	LPL	25.295
perirenal fat-5	LPL	26.2427
perirenal fat-5	LPL	25.9666
greater omentum fat-5	LPL	25.3823
greater omentum fat-5	LPL	25.0667
inguinal fat-5	LPL	26.6085
inguinal fat-5	LPL	26.1913
subcutaneous fat-1	ELOVL6	22.6958
subcutaneous fat-1	ELOVL6	22.7104
subcutaneous fat-1	ELOVL6	22.789
perirenal fat-1	ELOVL6	26.3736
perirenal fat-1	ELOVL6	26.1922
perirenal fat-1	ELOVL6	27.2742
greater omentum fat-1	ELOVL6	23.8364
greater omentum fat-1	ELOVL6	24.1866
greater omentum fat-1	ELOVL6	24.232
inguinal fat-1	ELOVL6	21.6887
inguinal fat-1	ELOVL6	21.4231
inguinal fat-1	ELOVL6	21.7212
subcutaneous fat-2	ELOVL6	22.6061
subcutaneous fat-2	ELOVL6	22.9128
subcutaneous fat-2	ELOVL6	22.7613
perirenal fat-2	ELOVL6	22.305
perirenal fat-2	ELOVL6	22.4019
perirenal fat-2	ELOVL6	22.6452
greater omentum fat-2	ELOVL6	22.5274
greater omentum fat-2	ELOVL6	22.587
greater omentum fat-2	ELOVL6	22.4851
inguinal fat-2	ELOVL6	22.3546
inguinal fat-2	ELOVL6	22.3344
inguinal fat-2	ELOVL6	22.2594
subcutaneous fat-3	ELOVL6	20.7825
subcutaneous fat-3	ELOVL6	20.8725
subcutaneous fat-3	ELOVL6	21.2411
perirenal fat-3	ELOVL6	22.9629
perirenal fat-3	ELOVL6	22.9934
perirenal fat-3	ELOVL6	24.8247
greater omentum fat-3	ELOVL6	21.1825
greater omentum fat-3	ELOVL6	21.9974
greater omentum fat-3	ELOVL6	22.3358
inguinal fat-3	ELOVL6	24.5986
inguinal fat-3	ELOVL6	24.8078
inguinal fat-3	ELOVL6	24.7439
subcutaneous fat-4	ELOVL6	25.3705
subcutaneous fat-4	ELOVL6	25.4005
perirenal fat-4	ELOVL6	20.898
perirenal fat-4	ELOVL6	21.1034
greater omentum fat-4	ELOVL6	22.8412
greater omentum fat-4	ELOVL6	22.7339
inguinal fat-4	ELOVL6	22.7961
inguinal fat-4	ELOVL6	23.2276
subcutaneous fat-5	ELOVL6	25.4002
subcutaneous fat-5	ELOVL6	25.6024
perirenal fat-5	ELOVL6	21.3244
perirenal fat-5	ELOVL6	21.4064
greater omentum fat-5	ELOVL6	23.3246
greater omentum fat-5	ELOVL6	23.4938
inguinal fat-5	ELOVL6	23.0925
inguinal fat-5	ELOVL6	23.1123
subcutaneous fat-1	PPARG	24.2789
subcutaneous fat-1	PPARG	24.6594
subcutaneous fat-1	PPARG	24.9228
perirenal fat-1	PPARG	25.4783
perirenal fat-1	PPARG	25.5431
perirenal fat-1	PPARG	25.7069
greater omentum fat-1	PPARG	29.8239
greater omentum fat-1	PPARG	30.1466
greater omentum fat-1	PPARG	30.3253
inguinal fat-1	PPARG	23.7189
inguinal fat-1	PPARG	23.761
inguinal fat-1	PPARG	23.5584
subcutaneous fat-2	PPARG	26.2547
subcutaneous fat-2	PPARG	26.2897
subcutaneous fat-2	PPARG	26.3921
perirenal fat-2	PPARG	25.8741
perirenal fat-2	PPARG	24.6147
perirenal fat-2	PPARG	26.03
greater omentum fat-2	PPARG	25.2967
greater omentum fat-2	PPARG	25.2093
greater omentum fat-2	PPARG	25.7513
inguinal fat-2	PPARG	23.7403
inguinal fat-2	PPARG	24.1814
inguinal fat-2	PPARG	24.4805
subcutaneous fat-3	PPARG	23.6985
subcutaneous fat-3	PPARG	23.5564
subcutaneous fat-3	PPARG	23.7441
perirenal fat-3	PPARG	27.1196
perirenal fat-3	PPARG	27.2103
perirenal fat-3	PPARG	27.1204
greater omentum fat-3	PPARG	32.5593
greater omentum fat-3	PPARG	32.5605
greater omentum fat-3	PPARG	33.0658
inguinal fat-3	PPARG	27.8134
inguinal fat-3	PPARG	27.6429
inguinal fat-3	PPARG	27.7123
subcutaneous fat-4	PPARG	26.5501
subcutaneous fat-4	PPARG	26.2434
perirenal fat-4	PPARG	25.1768
perirenal fat-4	PPARG	24.9674
greater omentum fat-4	PPARG	27.2794
greater omentum fat-4	PPARG	26.9913
inguinal fat-4	PPARG	25.9727
inguinal fat-4	PPARG	27.3169
subcutaneous fat-5	PPARG	26.4131
subcutaneous fat-5	PPARG	25.7728
perirenal fat-5	PPARG	25.464
perirenal fat-5	PPARG	25.4576
greater omentum fat-5	PPARG	27.7303
greater omentum fat-5	PPARG	27.8108
inguinal fat-5	PPARG	27.3836
inguinal fat-5	PPARG	26.344
subcutaneous fat-1	ACACA	28.4132
subcutaneous fat-1	ACACA	28.5598
subcutaneous fat-1	ACACA	28.4094
perirenal fat-1	ACACA	29.7113
perirenal fat-1	ACACA	30.1964
perirenal fat-1	ACACA	29.9984
greater omentum fat-1	ACACA	27.9588
greater omentum fat-1	ACACA	28.0623
greater omentum fat-1	ACACA	28.1342
inguinal fat-1	ACACA	24.9326
inguinal fat-1	ACACA	24.9262
inguinal fat-1	ACACA	24.9162
subcutaneous fat-2	ACACA	28.2015
subcutaneous fat-2	ACACA	28.2633
subcutaneous fat-2	ACACA	28.5813
perirenal fat-2	ACACA	25.9722
perirenal fat-2	ACACA	26.0854
perirenal fat-2	ACACA	26.0742
greater omentum fat-2	ACACA	26.7295
greater omentum fat-2	ACACA	26.7336
greater omentum fat-2	ACACA	26.7289
inguinal fat-2	ACACA	25.6924
inguinal fat-2	ACACA	25.7507
inguinal fat-2	ACACA	25.7332
subcutaneous fat-3	ACACA	27.2767
subcutaneous fat-3	ACACA	27.6503
subcutaneous fat-3	ACACA	27.2725
perirenal fat-3	ACACA	28.9355
perirenal fat-3	ACACA	26.9824
perirenal fat-3	ACACA	28.6065
greater omentum fat-3	ACACA	24.9787
greater omentum fat-3	ACACA	23.7564
greater omentum fat-3	ACACA	24.9194
inguinal fat-3	ACACA	28.4893
inguinal fat-3	ACACA	28.4606
inguinal fat-3	ACACA	28.3459
subcutaneous fat-4	ACACA	26.9347
subcutaneous fat-4	ACACA	26.9205
perirenal fat-4	ACACA	24.9133
perirenal fat-4	ACACA	24.6921
greater omentum fat-4	ACACA	25.0722
greater omentum fat-4	ACACA	24.8992
inguinal fat-4	ACACA	24.6162
inguinal fat-4	ACACA	24.8064
subcutaneous fat-5	ACACA	26.2878
subcutaneous fat-5	ACACA	26.1695
perirenal fat-5	ACACA	28.8427
perirenal fat-5	ACACA	28.4637
greater omentum fat-5	ACACA	25.9169
greater omentum fat-5	ACACA	25.8339
inguinal fat-5	ACACA	28.3901
inguinal fat-5	ACACA	28.1543

## Sheet: Table S5
Table S5 Raw data for WB
Sample Name	Target Name	Expression
subcutaneous fat-1	FABP4	0.593976
perirenal fat-1	FABP4	0.807338
greater omentum fat-1	FABP4	0.908271
inguinal fat-1	FABP4	1.13018
subcutaneous fat-2	FABP4	1.47376
perirenal fat-2	FABP4	1.43362
greater omentum fat-2	FABP4	1.17498
inguinal fat-2	FABP4	0.506638
subcutaneous fat-3	FABP4	0.544277
perirenal fat-3	FABP4	1.09293
greater omentum fat-3	FABP4	0.971395
inguinal fat-3	FABP4	1.35257
subcutaneous fat-4	FABP4	0.862733
perirenal fat-4	FABP4	0.995619
greater omentum fat-4	FABP4	0.657048
inguinal fat-4	FABP4	1.01971
subcutaneous fat-5	FABP4	1.0993
perirenal fat-5	FABP4	1.01404
greater omentum fat-5	FABP4	1.08386
inguinal fat-5	FABP4	0.634981
subcutaneous fat-1	FASN	0.883704
perirenal fat-1	FASN	1.28075
greater omentum fat-1	FASN	1.13618
inguinal fat-1	FASN	0.76854
subcutaneous fat-2	FASN	0.923532
perirenal fat-2	FASN	0.430942
greater omentum fat-2	FASN	0.735216
inguinal fat-2	FASN	0.561254
subcutaneous fat-3	FASN	0.64104
perirenal fat-3	FASN	1.00948
greater omentum fat-3	FASN	0.830795
inguinal fat-3	FASN	0.1028
subcutaneous fat-4	FASN	2.12119
perirenal fat-4	FASN	2.66938
greater omentum fat-4	FASN	1.05906
inguinal fat-4	FASN	1.57485
subcutaneous fat-5	FASN	2.61587
perirenal fat-5	FASN	1.89215
greater omentum fat-5	FASN	0.928429
inguinal fat-5	FASN	2.3533
